# Supplementary material for: Ewing and Ewing-like-sarcoma tumoroid biobank reveals distinct drug sensitivities: translocation makes the difference
Source: Research Square preprint supplement (doi:10.21203/rs.3.rs-5039845/v1), 2024-10-03
Supplement: Supplementary file 1 [file 174b5f3646b1a8fafec5caaa.xlsx]

## Sheet: Supplemental Table 4
Drug	Category	TargetType	TargetSubtype	TargetSubtypeGroup	Target	Pathways	Efficacy
(+)-JQ-1	Targeted	Protein kinases	Serine/threonine kinases	Other	BRD4	Chromotin regulation; DNA damage signaling	Antineoplastic
(S)-JQ-35	Targeted	Protein kinases	Serine/threonine kinases	Other	BRD4	Chromotin regulation; DNA damage signaling	Antineoplastic
3-AP	Targeted	Enzymes	Oxidoreductases (EC1)	Ribonucleoside-diphosphate reductase	RRM2	Purine metabolism; Pyrimidine metabolism; Glutathione metabolism; p53 signaling pathway	Antineoplastic
5-Fluorouridine	Cytotoxic	Enzymes	Transferases (EC2)	Pentosyltransferases	Uridine phosphorylase
6-Mercaptopurine	Cytotoxic	Enzymes	Transferases (EC2)	Pentosyltransferases	HPRT1	Purine metabolsim	Antineoplastic
6-Thioguanine	Cytotoxic	Enzymes	Transferases (EC2)	Pentosyltransferases	HPRT1	Purine metabolism	Antineoplastic; Antimetabolite
Abemaciclib	Targeted	Protein kinases	Serine/threonine kinases	CMGC group	CDK4; CDK6	Cell cycle; PI3K-Akt signaling pathway	Antineoplastic; Cyclin-dependent kinase (CDK) inhibitor
Actinomycin D	Cytotoxic	Enzymes	Transferases (EC2)	DNA-directed RNA polymerase	RNA polymerase	DNA replication	Antineoplastic
Adavosertib	Targeted	Protein kinases	Serine/threonine kinases	Other	WEE1	Cell cycle	Antineoplastic; WEE1 tyrosine kinase inhibitor
Afatinib	Targeted	Protein kinases	Receptor tyrosine kinases	EGFR family	EGFR; ERBB2 (HER2, CD340); ERBB4 (HER4)	MAPK signaling pathway; ErbB signaling pathway	Antineoplastic; Receptor tyrosine kinase inhibitor
Alectinib	Targeted	Protein kinases	Receptor tyrosine kinases	ALK family	ALK (CD246); EML4-ALK	PI3K-Akt signaling pathway	Antineoplastic; Anaplastic lymphoma kinase (ALK) inhibitor
Alisertib	Targeted	Protein kinases	Serine/threonine kinases	AGC group	AURKA		Antineoplastic; Serine/threonine kinase inhibitor
Apatinib	Targeted	Protein kinases	Receptor tyrosine kinases	VEGFR family	VEGFR2 (KDR)	MAPK signaling pathway; ErbB signaling pathway; VEGF signaling pathway	Antineoplastic; Receptor tyrosine kinase inhibitor
AT7519	Targeted	Protein kinases	Serine/threonine kinases	CMGC group	CDK1; CDK2	Cell cycle; PI3K-Akt signaling pathway	Antineoplatic; Cyclin-dependent kinase (CDK) inhibitor
Avapritinib	Targeted	Protein kinases	Receptor tyrosine kinases	PDGFR family	PDFRA*; KIT*	MAPK signaling pathway; Ras signaling pathway	Antineoplastic, Receptor tyrosine kinase inhibitor
Axitinib	Targeted	Protein kinases	Receptor tyrosine kinases	VEGFR family	VEGFR1 (FLT1); VEGFR2 (KDR); VEGFR3 (FLT4)	MAPK signaling pathway; VEGF signaling pathway	Antineoplastic; Receptor tyrosine kinase inhibitor
AZD1208	Targeted	Enzymes	Transferases (EC2)	non-specific serine/threonine protein kinase	PIM
AZD1390	Targeted	Protein kinases	Serine/threonine kinases	Other	ATM
AZD4547	Targeted	Protein kinases	Receptor tyrosine kinases	FGFR family	FGFR1; FGFR2; FGFR3; FGFR4	PI3K-Akt signaling pathway	Antineoplastic; Receptor tyrosine kinase inhibitor
AZD5582	Targeted	Not elsewhere classified	Cellular process	Apoptosis	cIAP1; cIAP2; XIAP	Apoptosis	Antineoplastic
AZD5991	Targeted	Not elsewhere classified	Cellular process	Apoptosis	MCL1	Apoptosis; JAK-STAT signaling pathway; MicroRNAs in cancer; PI3K-Akt signaling pathway	Antineoplastic
AZD8055	Targeted	Protein kinases	Serine/threonine kinases	Other	MTOR	mTOR signaling pathway	Antineoplastic; mTOR inhibitor
BAY-293	Targeted	Not elsewhere classified	Signaling molecules	Nucleotide exchange factor	SOS1
Belinostat	Targeted	Enzymes	Hydrolases (EC3)	Histone deacetylase	HDAC1; HDAC2; HDAC3; HDAC4; HDAC5; HDAC6; HDAC7; HDAC8; HDAC9; HDAC10; HDAC11	Cell cycle; Notch signaling pathway	Antineoplastic; Histone deacetylase inhibitor
Belvarafenib	Targeted	Protein kinases	Serine/threonine kinases	TKL group	BRAF; RAF1	MAPK signaling pathway; ErbB signaling pathway	Antineoplastic; BRAF kinase inhibitor
Berzosertib	Targeted	Protein kinases	Serine/threonine kinases	Other	ATR	Cell cycle; p53 signaling pathway; Cellular senescence	Antineoplastic; Serine/threonine kinase inhibitor
BI 894999	Targeted	Protein kinases	Serine/threonine kinases	Other	BRD4
BI-3406	Targeted	Not elsewhere classified	Signaling molecules	Nucleotide exchange factor	SOS1
Binimetinib	Targeted	Protein kinases	Serine/threonine kinases	STE group	MAP2K (MEK)	MAPK signaling pathway	Antineoplastic; Mitogen-activated extracellular signal-regulated kinase (MEK) in hibitor
Birabresib	Targeted	Protein kinases	Serine/threonine kinases	Other	BRD2; BRD3; BRD4	Chromotin regulation; DNA damage signaling	Antineoplastic
Birinapant	Targeted	Not elsewhere classified	Cellular process	Apoptosis	cIAP1; XIAP	Apoptosis	Antineoplastic
BMH-21	Cytotoxic	Enzymes	Transferases (EC2)	DNA-directed RNA polymerase	RNA polymerase	DNA replication	Antineoplastic
Bortezomib	Targeted	Enzymes	Hydrolases (EC3)	Threonine peptidases	PSMB5	Proteasome	Antineoplastic; Proteasome inhibitor
Bosutinib	Targeted	Protein kinases	Non-receptor tyrosine kinases	ABL family | SRC familiy	ABL1 | SRC	ErbB signaling pathway	Antineoplastic; Tyrosine kinase inhibitor
Brigatinib	Targeted	Protein kinases	Receptor tyrosine kinases	ALK family	EML4-ALK	PI3K-Akt signaling pathway	Antineoplastic; Anaplastic lymphoma kinase (ALK) inhibitor
Buparlisib	Targeted	Enzymes	Transferases (EC2)	Phosphotransferase	PI3Kα; PI3Kβ; PI3Kδ	PI3K-Akt signaling pathway	Antineoplastic; Phosphatidylinositol 3-kinase inhibitor
Cabozantinib	Targeted	Protein kinases	Receptor tyrosine kinases	AXL family | MET family | VEGFR family	AXL | MET | VEGFR2 (KDR)	MAPK signaling pathway; Ras signaling pathway; PI3K-Akt signaling pathway; VEGF signaling pathway	Antineoplastic; Receptor tyrosine kinase inhibitor
Camptothecin	Cytotoxic	Enzymes	Isomerases (EC5)	DNA topoisomerase	TOP1	DNA replication	Antioneoplastic; Topoisomerase I inhibitor
Capmatinib	Targeted	Protein kinases	Receptor tyrosine kinases	MET family	MET	Ras signaling pathway; PI3K-Akt signaling pathway	Antineoplastic; Receptor tyrosine kinase inhibitor
Carboplatin	Cytotoxic	Not elsewhere classified	Cellular process	DNA alkylating agent	DNA	DNA structure and function	Antineoplastic; Alkylating agents
Carfilzomib	Targeted	Enzymes	Hydrolases (EC3)	Threonine peptidases	PSMB5	Proteasome	Antineoplastic; Proteasome inhibitor
Cediranib	Targeted	Protein kinases	Receptor tyrosine kinases	VEGFR family	VEGFR1 (FLT1); VEGFR2 (KDR); VEGFR3 (FLT4)	MAPK signaling pathway; VEGF signaling pathway	Antineoplastic; Angiogenesis inhibitor; Receptor tyrosine kinase inhibitor
Ceralasertib	Targeted	Protein kinases	Serine/threonine kinases	Other	ATR	Cell cycle; p53 signaling pathway; Cellular senescence	Antineoplastic; Serine/threonine kinase inhibitor
Ceritinib	Targeted	Protein kinases	Receptor tyrosine kinases	ALK family	EML4-ALK	PI3K-Akt signaling pathway	Antineoplastic; Anaplastic lymphoma kinase (ALK) inhibitor
Cisplatin-AQ	Cytotoxic	Not elsewhere classified	Cellular process	DNA alkylating agents	DNA	DNA structure and function	Antineoplastic; Alkylating agents
Cobimetinib	Targeted	Protein kinases	Serine/threonine kinases	STE group	MAP2K (MEK)	MAPK signaling pathway	Antineoplastic; Mitogen-activated extracellular signal-regulated kinase (MEK) in hibitor
Copanlisib	Targeted	Enzymes	Transferases (EC2)	Phosphotransferase	PIK3CA, PIK3CD	PI3K-Akt signaling pathway	Antineoplastic, Phosphatidylinositol 3-kinase inhibitor
CPI-203	Targeted	Protein kinases	Serine/threonine kinases	Other	BRD4	Chromotin regulation; DNA damage signaling	Antineoplastic
CPI-455	Targeted	Enzymes	Oxidoreductases (EC1)	Demethylase	pan-KDM5
Crenigacestat	Targeted	Enzymes| Not elsewhere classified	Hydrolases (EC3) | Signaling molecules	Aspartic peptidases | Notch signaling	PSEN1; PSENEN; NCSTN; APH1A | NOTCH1	Notch signaling pathway	Antineoplastic
Crenolanib	Targeted	Protein kinases	Receptor tyrosine kinases	PDGFR family	FLT3 (CD135); PDGFR	MAPK signaling pathway	Antineoplastic; Receptor tyrosine kinase inhibitor
Crizotinib	Targeted	Protein kinases	Receptor tyrosine kinases	ALK family | MET family | INSR family	EML4-ALK | MET | ROS1	PI3K-Akt signaling pathway	Antineoplastic; Tyrosine kinase inhibitor
Cytarabine	Cytotoxic	Not elsewhere classified	Antimetabolite	Pyrimidine analogue	DNA polymerase	DNA structure and function	Antineoplastic; Antimetabolite; Antiviral; DNA polymerase inhibitor
Dabrafenib	Targeted	Protein kinases	Serine/threonine kinases	TKL group	BRAF	MAPK signaling pathway; ErbB signaling pathway	Antineoplastic; BRAF kinase inhibitor
Dacarbazine	Cytotoxic	Not elsewhere classified	Cellular process	DNA alkylating agent	DNA	DNA structure and function	Antineoplastic; Alkylating agents
Dasatinib	Targeted	Protein kinases	Non-receptor tyrosine kinases | Non-receptor tyrosine kinases | Receptor tyrosine kinases | Receptor tyrosine kinases	ABL family | SRC family | EPH family | PDGFR family	BCR-AB | SRC; FYN; LCK; YES1 | EPHA2 | PDGFRB; KIT (CD117)	MAPK signaling pathway; ErbB signaling pathway; VEGF signaling pathway	Antineoplastic; Tyrosine kinase inhibitor
Daunorubicin	Cytotoxic	Enzymes	Isomerases (EC5)	DNA topoisomerase	TOP2	DNA replication	Antibiotic; Antineoplastic; Topoisomerase II inhibitor
Decitabine (Guadecitabine)	Cytotoxic	Enzymes	Transferases (EC2)	Methyltransferases	DNMT	Cysteine and methionine metabolism; MicroRNAs in cancer	Antineoplastic; Antimetabolite
Defactinib	Targeted	Protein kinases	Non-receptor tyrosine kinases	FAK family	PTK2B	Chemokine signaling pathway; Natural killer cell mediated cytotoxicity; Leukocyte transendothelial migration; GnRH signaling pathway
Dexamethasone	Cytotoxic	Nuclear receptors	Estrogen like receptors	3-Ketosteroid receptor	NR3C1 (GR)	Neuroactive ligand-receptor interaction	Anti-inflammatory; Antirheumatic; Glucocorticoid receptor agonist
Docetaxel	Cytotoxic	Not elsewhere classified	Cellular process	Cytoskeleton	TUBB	Gap junction
Dovitinib	Targeted	Protein kinases	Receptor tyrosine kinases	FGFR family | PDGFR family | VEGFR family	FGFR3 | PDGFRB; KIT (CD117); FLT3 (CD135) | VEGFR1 (FLT1); VEGFR2 (KDR); VEGFR3 (FLT4)	MAPK signaling pathway; PI3K-Akt signaling pathway	Antineoplastic; Receptor tyrosine kinase inhibitor
Doxorubicin	Cytotoxic	Enzymes	Isomerases (EC5)	DNA topoisomerase	TOP2	DNA replication	Antineoplastic; Topoisomeriase II inhibitor
Eganelisib	Targeted	Enzymes	Transferases (EC2)	Phosphotransferase	PIK3CG	PI3K-Akt signaling pathway	Antineoplastic; Phosphatidylinositol 3-kinase inhibitor
EHT 1864	Targeted	Not elsewhere classified	Signaling molecules	G protein	Rac1; Rac1b; Rac2; Rac3	Rac-Rho signaling	Antineoplastic
Eltanexor	Targeted	Transporters	Other transporters	Channels and pores	XPO1	Nucleocytoplasmic transport	Antineoplastic, Nuclear export inhibitor
Enasidenib	Targeted	Enzymes	Oxidoreductases (EC1)	Dehydrogenases	IDH2	2-Oxocarboxylic acid metabolism; Biosynthesis of amino acids; Peroxisome	Antineoplastic
Ensartinib	Targeted	Protein kinases	Receptor tyrosine kinases	ALK family	ALK (CD246)	PI3K-Akt signaling pathway	Antineoplastic; Anaplastic lymphoma kinase (ALK) inhibitor
Entinostat	Targeted	Enzymes	Hydrolases (EC3)	Histone deacetylase	HDAC1; HDAC2; HDAC3; HDAC4; HDAC5; HDAC6; HDAC7; HDAC8; HDAC9; HDAC10; HDAC11	Cell cycle; Notch signaling pathway	Antineoplastic; Histone deacetylase inhibitor
Entospletinib	Targeted	Protein kinases	Non-receptor tyrosine kinases	SYK family	SYK	NF-kappa B signaling pathway; PI3K-AKT signaling pathway; Platelet activation	Antineoplastic; Tyrosine kinase inhibitor
Entrectinib	Targeted	Protein kinases	Receptor tyrosine kinases	ALK family | INSR family | TRK family	ALK (CD246) | ROS1 | NTRK1 (TRKA); NTRK2 (TRKB); NTRK3 (TRKC)	PI3K-Akt signaling pathway	Antineoplastic, Tyrosine kinase inhibitor
Epidaza	Targeted	Enzymes	Hydrolases (EC3)	Histone deacetylase	HDAC1; HDAC2; HDAC3; HDAC10	Cell cycle; Notch signaling pathway	Antineoplastic; Histone deacetylase inhibitor
APR-246	Targeted	Not elsewhere classified | Enzymes	Signaling molecules | Oxidoreductases	Transcription factor | Thioredoxin-disulfide reductase	TP53 | TXNRD1
Erdafitinib	Targeted	Protein kinases	Receptor tyrosine kinases	FGFR family	FGFR2; FGFR3	PI3K-Akt signaling pathway	Antineoplastic; Receptor tyrosine kinase inhibitor
Erlotinib	Targeted	Protein kinases	Receptor tyrosine kinases	EGFR family	EGFR	MAPK signaling pathway; ErbB signaling pathway	Antineoplastic; Receptor tyrosine kinase inhibitor
Etoposide	Cytotoxic	Enzymes	Isomerases (EC5)	DNA topoisomerase	TOP2	DNA replication	Antineoplastic; Topoisomeriase II inhibitor
Everolimus	Targeted	Protein kinases	Serine/threonine kinases	Other	MTOR	ErbB signaling pathway; mTOR signaling pathway	Antineoplastic; Immunosuppressant; mTOR inhibitor
Fadraciclib	Targeted	Protein kinases	Serine/threonine kinases	CMGC group	CDK2; CDK9
Fenretinide	Cytotoxic	Nuclear receptors	Thyroid hormone like receptors	Retinoic acid receptor	NR1B (RAR)	Estrpgen signaling pathway	Antineoplastic
Fimepinostat	Targeted	Enzymes	Hydrolases (EC3) | Transferases (EC2)	Hystone deacetylase | Phosphotransferase	HDAC1; HDAC2; HDAC3; HDAC4; HDAC5; HDAC6; HDAC7; HDAC8; HDAC9; HDAC10 | PIK3C3 (VPS34)	Inositol phosphate metabolism; Phosphatidylinositol signaling system; Cell cycle	Antineoplastic; Histone deacetylase inhibitor
Futibatinib	Targeted	Protein kinases	Receptor tyrosine kinases	FGFR family	FGFR2	MAPK signaling pathway
FX1	Targeted	Not elsewhere classified	Signaling molecules	Transcription factor	BCL6	FoxO signaling pathway	Antineoplastic
Galunisertib	Targeted	Protein kinases	Receptor serine/threonine kinases	TGFBR1 family	TGFBR1	TGF-beta signaling pathway	Antineoplastic
Ganetespib	Targeted	Not elsewhere classified	Signaling molecules	Chaperone and folding catalyst	HSP90	PI3K-Akt signaling pathway; Estrogen signaling pathway	Antineoplastic; Hsp 90 inhibitor
Gemcitabine	Cytotoxic	Enzymes	Oxidoreductases (EC1)	Ribonucleoside-diphosphate reductase	RRM1	Purine metabolism; Pyrimidine metabolism	Antineoplastic; Antimetabolite
Glasdegib	Targeted	G Protein-coupled receptors	Frizzled/Smoothened family	Smoothened	SMO	Hedgehog signaling pathway	Antineoplastic; Smoothened receptor antagonist
GSK J4	Targeted	Enzymes	Oxidoreductases (EC1)	Demethylase	KDM6A; KDM6B	Transcriptional misregulation in cancer
GSK1070916	Targeted	Protien kinases	Serine/threonine kinases	AGC group	AURKB; AURKC		Antineoplastic; Serine/threonine kinase inhibitor
GSK-126	Targeted	Enzymes	Transferases (EC2)	Methyltransferases	EZH2	Lysine degradation; MicroRNAs in cancer	Antineoplastic; Histone methyltransferase inhibitor
GSK2636771	Targeted	Enzymes	Transferases (EC2)	Phosphotransferase	PIK3β	PI3K-Akt signaling pathway	Antineoplastic; Phosphatidylinositol 3-kinase inhibitor
GSK269962A	Targeted	Protein kinases	Serine/threonine kinases	AGC group	ROCK1; ROCK2	Chemokine signaling pathway; Wnt signaling pathway; cAMP signaling pathway	Antineoplastic
GSK2830371	Targeted	Protein kinases	Serine/threonine kinases	Other	WIP1
GSK461364	Targeted	Protein kinases	Serine/threonine kinases	Other	PLK1	Cell cycle	Antineoplastic; Polo-like kinase inhibitor
I-BRD9	Targeted	Protein kinases	Serine/threonine kinases	Other	BRD9	Chromotin regulation	Antineoplastic
Ibrutinib	Targeted	Protein kinases	Non-receptor tyrosine kinases	Tec family	BTK	B cell receptor signaling pathway	Antineoplastic, Bruton's tyrosine kinase inhibitor
Icotinib	Targeted	Protein kinases	Receptor tyrosine kinases	EGFR family	EGFR	EGFR tyrosine kinase inhibitor resistance	Antineoplastic; Receptor tyrosine kinase inhibitor
Idarubicin	Cytotoxic	Enzymes	Isomerases (EC5)	DNA topoisomerase	TOP2	DNA replication	Antibiotic, Antineoplastic, Topoisomerase II inhibitor
Idasanutlin	Targeted	Enzymes	Transferases (EC2)	E3 ubiquitin-protein ligase	MDM2	p53 signaling pathway	Antineoplastic
Idelalisib	Targeted	Enzymes	Transferases (EC2)	Phosphotransferase	PI3Kδ	PI3K-Akt signaling pathway; Apoptosis; B cell receptor signaling pathway	Antineoplastic; Phosphatidylinositol 3-kinase inhibitor
Imatinib	Targeted	Protein kinases	Non-receptor tyrosine kinases | Receptor tyrosine kinases	ABL family | PDGFR family	BCR-ABL | FIP1L1-PDGFRA; KIT (CD117)	MAPK signaling pathway	Antineoplastic; Tyrosine kinase inhibitor
Ipatasertib	Targeted	Protein kinases	Serine/threonine kinases	AGC group	AKT (PKB)	PI3K-Akt signaling pathway	Antineoplastic; AKT serine/threonine kinase inhibitor
Isotretinoin	Cytotoxic	Nuclear receptors	Thyroid hormone like receptors	Retinoic acid receptor	NR1B (RAR)	Th17 cell differentiation	Anti-acne; Keratolytic; Retinoic acid receptor (RAR) agonist
Ixazomib	Targeted	Enzymes	Hydrolases (EC3)	Threonine peptidases	PSMB5	Proteasome	Antineoplastic; Proteasome inhibitor
JQ-1 carboxylic acid ((+)-JQ-1)	Targeted	Protein kinases	Serine/threonine kinases	Other	BRD4	Chromotin regulation; DNA damage signaling	Antineoplastic
KU-55933	Targeted	Protein kinases	Serine/threonine kinases	Other	ATM	Cell cycle; p53 signaling pathway; Cellular senescence	Antineoplastic; Serine/threonine kinase inhibitor
KU-60019	Targeted	Protein kinases	Serine/threonine kinases	Other	ATM	Cell cycle; p53 signaling pathway; Cellular senescence	Antineoplastic; Serine/threonine kinase inhibitor
Lapatinib	Targeted	Protein kinases	Receptor tyrosine kinases	EGFR family	EGFR; ERBB2 (HER2, CD340)	MAPK signaling pathway; ErbB signaling pathway	Antineoplastic; Receptor tyrosine kinase inhibitor
Larotrectinib	Targeted	Protein kinases	Receptor tyrosine kinases	TRK family	NTRK1 (TRKA); NTRK2 (TRKB); NTRK3 (TRKC)	Neurotrophin signaling pathway	Antineoplastic; Tropomyosin receptor kinase inhibitor
Lenvatinib	Targeted	Protein kinases	Receptor tyrosine kinases	FGFR family | RET family | VEGFR family	FGFR1; FGFR2; FGFR3; FGFR4 | RET | VEGFR1 (FLT1); VEGFR2 (KDR); VEGFR3 (FLT4)	MAPK signaling pathway; VEGF signaling pathway	Antineoplastic; Receptor tyrosine kinase inhibitor
LGK974	Targeted	Enzymes	Transferases (EC2)	Acyltransferase	PORCN	Wnt signaling pathway	Antineoplastic
Linsitinib	Targeted	Protein kinases	Receptor tyrosine kinases	INSR family	IGF1R (CD221)	Focal adhesion; Adherens junction	Antineoplastic; Insulin-like growth factor 1 receptor antagonist
LMK-235	Targeted	Enzymes	Hydrolases (EC3)	Hystone deacetylase	HDAC4; HDAC5	Cell cycle; Notch signaling pathway	Antineoplastic; Histone deacetylase inhibitor
Lomustine	Cytotoxic	Not elsewhere classified	Cellular process	DNA alkylating agents	DNA	DNA structure and function	Antineoplastic; Alkylating agents
Lorlatinib	Targeted	Protein kinases	Receptor tyrosine kinases	ALK family | INSR family	ALK (CD246); EML4-ALK | ROS1	PI3K-Akt signaling pathway	Antineoplastic; Tyrosine kinase inhibitor
LTURM34	Targeted	Protein kinases	Serine/threonine kinases	Other	DNA-PK	Non-homologous end-joining; DNA damage signaling; DNA repair signaling
LY3200882	Targeted	Protein kinases	Receptor serine/threonine kinases	TGFBR1 family	TGFBR1
Masitinib	Targeted	Protein kinases	Receptor tyrosine kinases	PDGFR family	KIT (CD117)	MAPK signaling pathway	Antineoplastic (veterinary); Receptor tyrosine kinase inhibitor
Melphalan	Cytotoxic	Not elsewhere classified	Cellular process	DNA alkylating agents	DNA	DNA structure and function	Antineoplastic; Alkylating agents
Merestinib	Targeted	Protein kinases	Receptor tyrosine kinases | Receptor tyrosine kinases | Serine/threonine kinases	AXL family | MET family | CAMK group	AXL | MET; RON | MKNK	MAPK signaling pathway	Antineoplastic
Methotrexate	Cytotoxic	Enzymes	Oxidoreductases (EC1)	Dihydrofolate reductase	DHFR	One carbon pool by folate; Folate biosynthesis	Antineoplastic; Antimetabolite
Midostaurin	Targeted	Protein kinases	Receptor tyrosine kinases | Receptor tyrosine kinases | Serine/threonine kinases	PDGFR family | VEGFR family | AGC group	PDGFR; KIT (CD117); FLT3 (CD135) | VEGFR2 (KDR) | PRKCA; PRKCB; PRKCG	MAPK signaling pathway; PI3K-Akt signaling pathway; VEGF signaling pathway; Leukocyte transendothelial migration	Antineoplastic; Receptor tyrosine kinase inhibitor
Milademetan	Targeted	Enzymes	Transferases (EC2)	E3 ubiquitin-protein ligase	MDM2	p53 signaling pathway	Antineoplastic
Miransertib	Targeted	Protein kinases	Serine/threonine kinases	AGC group	AKT (PKB)	PI3K-Akt signaling pathway	Antineoplastic; AKT serine/threonine kinase inhibitor
Mirdametinib	Targeted	Protein kinases	Serine/threonine kinases	STE group	MAP2K1 (MEK1); MAP2K2 (MEK2)	MAPK signaling pathway	Antineoplastic; Mitogen-activated extracellular signal-regulated kinase (MEK) in hibitor
Mitoxantrone	Cytotoxic	Enzymes	Isomerases (EC5)	DNA topoisomerase	TOP2	DNA replication	Antineoplastic; Topoisomeriase II inhibitor
MK-2206	Targeted	Protein kinases	Serine/threonine kinases	AGC group	AKT (PKB)	PI3K-Akt signaling pathway	Antineoplastic; AKT serine/threonine kinase inhibitor
MM102	Targeted	Enzymes	Transferases (EC2)	Methyltransferases	MLL1	Lysine degradation
Molibresib	Targeted	Protein kinases	Serine/threonine kinases	Other	BRD4	Chromotin regulation; DNA damage signaling	Antineoplastic
Momelotinib	Targeted	Protein kinases	Non-receptor tyrosine kinases	JAK family	JAK1; JAK2	Chemokine signaling pathway; JAK-STAT signaling pathway	Antineoplastic; Janus kinase (JAK) inhibitor
MTIC	Cytotoxic	Not elsewhere classified	Cellular process	DNA alkylating agents	DNA	DNA structure and function	Antineoplastic; Alkylating agents
Mubritinib	Targeted	Protein kinases	Receptor tyrosine kinases	EGFR family	ERBB2 (HER2, CD340)	ErbB signaling pathway	Antineoplastic; Receptor tyrosine kinase inhibitor
MX69	Targeted	Enzymes	Transferases (EC2)	E3 ubiquitin-protein ligase	MDM2; XIAP	p53 signaling pathway; Apoptosis	Antineoplastic
Navitoclax	Targeted	Not elsewhere classified	Cellular process	Apoptosis	BCL2L	Apoptosis	Antineoplastic; Bcl-2 family inhibitor
Nedisertib	Targeted	Protein kinases	Serine/threonine kinases	Other	DNA-PK	Non-homologous end-joining; DNA damage signaling; DNA repair signaling
Neratinib	Targeted	Protein kinases	Receptor tyrosine kinases	EGFR family	EGFR; ERBB2 (HER2, CD340); ERBB4 (HER4)	EGFR tyrosine kinase inhibitor resistance; ErbB signaling pathway	Antineoplastic; Receptor tyrosine kinase inhibitor
Nilotinib	Targeted	Protein kinases	Non-receptor tyrosine kinases | Receptor tyrosine kinases	ABL family | PDGFR family	BCR-ABL | PDGFR; KIT (CD117)	MAPK signaling pathway; ErbB signaling pathway	Antineoplastic; Tyrosine kinase inhibitor
Niraparib	Targeted	Enzymes	Transferases (EC2)	Pentosyltransferases	PARP1; PARP2	Apoptosis; Necroptosis	Antineoplasstic; PARP inhibitor
NSC 617145	Targeted	Enzymes	Isomerases (EC5)	DNA 3'-5' helicase	WRN
Olaparib	Targeted	Enzymes	Transferases (EC2)	Pentosyltransferases	PARP1; PARP2	Base excision repair; NF-kappa B signaling pathway; Apoptosis; Necroptosis	Antineoplastic; PARP inhibitor
Osimertinib	Targeted	Protein kinases	Receptor tyrosine kinases	EGFR family	EGFR	EGFR tyrosine kinase inhibitor resistance; MAPK signaling pathway; ErbB signaling pathway	Antineoplastic; Receptor tyrosine kinase inhibitor
Oxaliplatin	Cytotoxic	Not elsewhere classified	Cellular process	DNA alkylating agents	DNA	DNA structure and function	Antineoplastic; Alkylating agents
Paclitaxel	Cytotoxic	Not elsewhere classified	Cellular process	Cytoskeleton	TUBB	Gap junction	Antineoplastic; Tubulin depolymerization inhibitor
Palbociclib	Targeted	Protein kinases	Serine/threonine kinases	CMGC group	CDK4; CDK6	Cell cyckle; PI3K-Akt signaling pathway	Antineoplastic; Cyclin-dependent kinase (CDK) inhibitor
Pamiparib	Targeted	Enzymes	Transferases (EC2)	Pentosyltransferases	PARP1; PARP2; PARP3	Base excision repair; Apoptosis; Necroptosis	Antineoplastic
Panobinostat	Targeted	Enzymes	Hydrolases (EC3)	Histone deacetylase	HDAC1; HDAC2; HDAC3; HDAC4; HDAC5; HDAC6; HDAC7; HDAC8; HDAC9; HDAC10; HDAC11	Cell cycle; Notch signaling pathway	Antineoplastic; Histone deacetylase inhibitor
Pazopanib	Targeted	Protein kinases	Receptor tyrosine kinases	PDGFR family | VEGFR family	PDGFR; KIT (CD117) | VEGFR1 (FLT1); VEGFR2 (KDR); VEGFR3 (FLT4)	MAPK signaling pathway	Antineoplastic; Receptor tyrosine kinase inhibitor
PCI-34051	Targeted	Enzymes	Hydrolases (EC3)	Hystone deacetylase	HDAC8	Cell cycle; Notch signaling pathway	Antineoplastic; Histone deacetylase inhibitor
Perifosine	Targeted	Protein kinases	Serine/threonine kinases	AGC group | CMGC group	AKT (PKB); PRKCA | ERK	PI3K-Akt signaling pathway	Antineoplastic; AKT serine/threonine kinase inhibitor
Pevonedistat	Targeted	Not elsewhere classified	Cellular process	Ubiquitin system	NAE1		Antineoplastic; NEDD8 activating enzyme inhibitor
Pictilisib	Targeted	Enzymes	Transferases (EC2)	Phosphotransferase	PI3Kα; PI3Kβ; PI3Kδ	PI3K-Akt signaling pathway	Antineoplastic; Phosphatidylinositol 3-kinase inhibitor
Pidnarulex	Targeted	Not elsewhere classified	Cellular process	DNA structures	G-quadruplex	DNA structure and function
Pimasertib	Targeted	Protein kinases	Serine/threonine kinases	STE group	MAP2K1 (MEK1); MAP2K2 (MEK2)	MAPK signaling pathway, ErbB signaling pathway, VEGF signaling pathway	Antineoplastic, Mitogen-activated extracellular signal-regulated kinase (MEK) inhibitor
Pinometostat	Targeted	Enzymes	Transferases (EC2)	Methyltransferases	DOT1L	Lysine degradation	Antineoplastic
Ponatinib	Targeted	Protein kinases	Non-receptor tyrosine kinases	ABL family	BCR-ABL	MAPK signaling pathway	Antineoplastic; Tyrosine kinase inhibitor
Prednisolone	Cytotoxic	Nuclear receptors	Estrogen like receptors	3-Ketosteroid receptor	NR3C1 (GR)	Neuroactive ligand-receptor interaction	Anti-inflammatory; Antirheumatic; Glucocorticoid receptor agonist
Prexasertib	Targeted	Protein kinases	Serine/threonine kinases	CAMK group	CHEK1	Cell cycle; p53 signaling pathway	Antineoplastic; Checkpoint kinase inhibitor
Quizartinib	Targeted	Protein kinases	Receptor tyrosine kinases	PDGFR family	FLT3 (CD135)	Hematopoietic cell lineage	Antineoplastic; Receptor tyrosine kinase inhibitor
Ravoxertinib	Targeted	Protein kinases	Serine/threonine kinases	CMGC group	ERK	MAPK signaling pathway; RAS signaling pathway	Antineoplastic
Regorafenib	Targeted	Protein kinases	Receptor tyrosine kinases | Receptor tyrosine kinases | Receptor tyrosine kinases | Receptor tyrosine kinases | Receptor tyrosine kinases | Serine/threonine kinases	FGFR family |PDGFR family | RET family | TIE family | VEGFR family | TKL group	FGFR1 | PDGFRB; KIT (CD117) | RET | TEK (TIE2, CD202) | VEGFR1 (FLT1); VEGFR2 (KDR); VEGFR3 (FLT4) | BRAF; RAF1	MAPK signaling pathway; VEGF signaling pathway	Antineoplastic; Receptor tyrosine kinase inhibitor
Ribociclib	Targeted	Protein kinases	Serine/threonine kinases	CMGC group	CDK4; CDK6	Cell cycle; PI3K-Akt signaling pathway	Antineoplatic; Cyclin-dependent kinase (CDK) inhibitor
Ritlectinib	Targeted	Protein kinases	Non-receptor tyrosine kinases	JAK family	JAK3	Chemokine signaling pathway; JAK-STAT signaling pathway	Antirheumatic; Janus kinase (JAK) inhibitor
Rogaratinib	Targeted	Protein kinases	Receptor tyrosine kinases	FGFR family	FGFR1; FGFR2; FGFR3; FGFR4	PI3K-Akt signaling pathway
Romidepsin	Targeted	Enzymes	Hydrolases (EC3)	Histone deacetylase	HDAC1; HDAC2; HDAC3; HDAC4; HDAC5; HDAC6; HDAC7; HDAC8; HDAC9; HDAC10; HDAC11	Cell cycle; Notch signaling pathway	Antineoplastic; Histone deacetylase inhibitor
Rucaparib	Targeted	Enzymes	Transferases (EC2)	Pentosyltransferases	PARP1; PARP2; PARP3	Base excision repair; Apoptosis; Necroptosis	Antineoplatic; PARP inhibitor
Ruxolitinib	Targeted	Protein kinases	Non-receptor tyrosine kinases	JAK family	JAK1; JAK2	Chemokine signaling pathway; JAK-STAT signaling pathway	Antineoplastic; Janus kinase (JAK) inhibitor
S63845	Targeted	Not elsewhere classified	Cellular process	Apoptosis	MCL1	Apoptosis; JAK-STAT signaling pathway; MicroRNAs in cancer; PI3K-Akt signaling pathway	Antineoplastic
Samotolisib	Targeted	Protein kinases | Enzymes	Serine/threonine kinases | Transferases (EC2)	Other | Phosphotransferase	MTOR | PI3Kα; PI3Kβ; PI3Kδ	PI3K-Akt signaling pathway; mTOR signaling pathway;	Antineoplastic; Phosphatidylinositol 3-kinase inhibitor; mTOR inhibitor
Sapitinib	Targeted	Protein kinases	Receptor tyrosine kinases	EGFR family	EGFR; ERBB2 (HER2, CD340); ERBB3 (HER3)	ErbB signaling pathway	Antineoplastic; Receptor tyrosine kinase inhibitor
SAR405	Targeted	Enzymes	Transferases (EC2)	Phosphotransferase	PIK3C3 (VPS34)	Inositol phosphate metabolism; Phosphatidylinositol signaling system; Cell cycle	Antineoplastic; Histone deacetylase inhibitor
Saracatinib	Targeted	Protein kinases	Non-receptor tyrosine kinases	ABL family | SRC family	ABL1 | SRC	ErbB signaling pathway; Chemokine signaling pathway; VEGF signaling pathway	Antineoplastic; Tyrosine kinase inhibitor
Savolitinib	Targeted	Protein kinases	Receptor tyrosine kinases	MET family	MET	MAPK signaling pathway	Antioneoplastic; Receptor tyrosine kinase inhibitor
Selinexor	Targeted	Transporters	Other transporters	Channels and pores	XPO1	RNA transport	Antineoplastic; Nuclear export inhibitor
Selumetinib	Targeted	Protein kinases	Serine/threonine kinases	STE group	MAP2K (MEK)	MAPK signaling pathway; ErbB signaling pathway	Antineoplastic; Mitogen-activated extracellular signal-regulated kinase (MEK) in hibitor
Sepantronium bromide	Targeted	Not elsewhere classified	Cellular process	Apoptosis	BIRC5	Apoptosis; Hippo signaling pathway	Antineoplastic; Survivin inhibitor
SHP099	Targeted	Enzymes	Hydrolases (EC3)	Phosphatases	SHP2	Ras signaling pathway	Antineoplastic
Siremadlin	Targeted	Enzymes	Transferases (EC2)	E3 ubiquitin-protein ligase	MDM2	p53 signaling pathway	Antineoplastic
Sirolimus	Targeted	Protein kinases	Serine/threonine kinases	Other	MTOR	mTOR signaling pathway	Antineoplastic; Immunosuppressant; mTOR inhibitor
Sitravatinib	Targeted	Protein kinases	Receptor tyrosine kinases	AXL family | EPH family | MET family | PDGFR family | VEGFR family	AXL | EPHA1; EPHA2; EPHB1; EPHB2; EPHB4 | MET | PDGFR | VEGFR1 (FLT1); VEGFR2 (KDR); VEGFR3 (FLT4)	MAPK signaling pathway; PI3K-Akt signaling pathway	Antineoplastic; Receptor tyrosine kinase inhibitor
SJ172550	Targeted	Enzymes	Transferases (EC2)	E3 ubiquitin-protein ligase	MDM4	p53 signaling pathway	Antineoplastic
SN-38 (Irinotecan)	Cytotoxic	Enzymes	Isomerases (EC5)	DNA topoisomerase	TOP1	DNA replication	Antioneoplastic; Topoisomerase I inhibitor
Sonidegib	Targeted	G Protein-coupled receptors	Frizzled/Smoothened family	Smoothened	SMO	Hedgehog signaling pathway	Antineoplastic; Smoothened receptor antagonist
Sorafenib	Targeted	Protein kinases	Receptor tyrosine kinases | Receptor tyrosine kinases | Receptor tyrosine kinases | Serine/threonine kinases	PDGFR family | RET family | VEGFR family | TKL group	PDGFRB; KIT (CD117); FLT3 (CD135) | RET | VEGFR2 (KDR); VEGFR3 (FLT4) | BRAF; RAF1	MAPK signaling pathway; ErbB signaling pathway; VEGF signaling pathway	Antineoplastic; Tyrosine kinase inhibitor
SR-4835	Targeted	Protein kinases	Serine/threonine kinases	CMGC group	CDK12; CDK13	Cell cycle; PI3K-Akt signaling pathway
Staurosporine	Targeted	Protein kinases	Serine/threonine kinases	AGC group	PKC	MAPK signaling pathway; PI3K-Akt signaling pathway; VEGF signaling pathway; ErbB signaling pathway; Ras signaling pathway; NF-kappa B signaling pathway; mTOR signaling pathway	Antineoplastic; Receptor tyrosine kinase inhibitor
Sunitinib	Targeted	Cytokines and receptors | Protein kinases | Protein kinases | Protein kinases	Cytokine receptors | Receptor tyrosine kinases | Receptor tyrosine kinases | Receptor tyrosine kinases	CSF and other factor receptors | PDGFR family | RET family | VEGFR family	CSF1 | PDGFR; KIT (CD117); FLT3 (CD135) | RET | VEGFR1 (FLT1); VEGFR2 (KDR); VEGFR3 (FLT4)	MAPK signaling pathway; VEGF signaling pathway	Antineoplastic; Angiogenesis inhibitor; Receptor tyrosine kinase inhibitor
TAK-580	Targeted	Protein kinases	Serine/threonine kinases	TKL group	BRAF; RAF1
TAK632	Targeted	Protein kinases	Serine/threonine kinases	TKL group	BRAF; RAF1
Talazoparib	Targeted	Enzymes	Transferases (EC2)	Pentosyltransferases	PARP1; PARP2	Base excision repair; Apoptosis; Necroptosis	Antineoplastic; PARP inhibitor
Tanespimycin	Targeted	Not elsewhere classified	Signaling molecules	Chaperone and folding catalyst	HSP90	PI3K-Akt signaling pathway; Estrogen signaling pathway	Antineoplastic; Hsp 90 inhibitor
Tapotoclax	Targeted	Not elsewhere classified	Cellular process	Apoptosis	MCL1	Apoptosis; JAK-STAT signaling pathway; MicroRNAs in cancer; PI3K-Akt signaling pathway	Antineoplastic
Taselisib	Targeted	Enzymes	Transferases (EC2)	Phosphotransferase	PI3Kα; PI3Kβ; PI3Kδ	PI3K-Akt signaling pathway	Antineoplastic; Phosphatidylinositol 3-kinase inhibitor
Tazemetostat	Targeted	Enzymes	Transferases (EC2)	Methyltransferases	EZH2	Lysine degradation; MicroRNAs in cancer	Antineoplastic; Histone methyltransferase inhibitor
Temozolomide	Cytotoxic	Not elsewhere classified	Cellular process	DNA alkylating agents	DNA	DNA structure and function	Antineoplastic; Alkylating agents
Temsirolimus	Targeted	Protein kinases	Serine/threonine kinases	Other	MTOR	ErbB signaling pathway; mTOR signaling pathway	Antineoplastic; mTOR inhibitor
Temuterkib	Targeted	Protein kinases	Serine/threonine kinases	CMGC group	ERK	RAS signaling pathway	Antineoplastic
ThioTEPA	Cytotoxic	Not elsewhere classified	Cellular process	DNA alkylating agents	DNA	DNA structure and function	Antineoplastic; Alkylating agents
THZ1	Targeted	Protein kinases	Serine/threonine kinases	CMGC group	CDK7	Cell cycle; PI3K-Akt signaling pathway	Antineoplatic; Cyclin-dependent kinase (CDK) inhibitor
THZ531	Targeted	Protein kinases	Serine/threonine kinases	CMGC group	CDK12; CDK13	Cell cycle; PI3K-Akt signaling pathway	Antineoplastic; Cyclin-dependent kinase (CDK) inhibitor
Tivantinib	Targeted	Protein kinases	Receptor tyrosine kinases	MET family	MET	Ras signaling pathway; Focal adhesion; Adherens junction	Antineoplastic; Receptor tyrosine kinase inhibitor
TK216	Targeted	Not elsewhere classified	Signaling molecules	Spliceosome	EWS-FLI1
Topotecan	Cytotoxic	Enzymes	Isomerases (EC5)	DNA topoisomerase	TOP1	DNA replication	Antineoplastic; Topoisomeriase I inhibitor
Trabectedin	Cytotoxic	Not elsewhere classified	Cellular process	DNA alkylating agents	DNA	DNA structure and function	Antineoplastic; Alkylating agents
Trametinib	Targeted	Protein kinases	Serine/threonine kinases	STE group	MAP2K (MEK)	MAPK signaling pathway; ErbB signaling pathway	Antineoplastic; Mitogen-activated extracellular signal-regulated kinase (MEK) in hibitor
Trofosfamide	Cytotoxic	Not elsewhere classified	Cellular process	DNA alkylating agents	DNA	DNA structure and function	Antineoplastic; Alkylating agents
Tucidinostat	Targeted	Cell surface molecules and ligands | Enzymes	Other cell surface molecules | Hydrolases	CD molecules | Histone deacetylase	CD8; CD244 | HDAC1; HDAC2; HDAC3; HDAC10	Cell cycle; Notch signaling pathway; Hematopoietic cell lineage; Natural killer cell mediated cytotoxicity; T cell receptor signaling pathway	Antineoplastic, Histone deacetylase inhibitor
UC2288	Targeted	Not elsewhere classified	Cellular process	Cell cycle	CDKN1A
Vactosertib	Targeted	Protein kinases	Receptor tyrosine kinases	ALK family	ALK (CD246)	PI3K-Akt signaling pathway	Antineoplastic; Anaplastic lymphoma kinase (ALK) inhibitor
Vandetanib	Targeted	Protein kinases	Receptor tyrosine kinases	EGFR family | RET family | VEGFR family	EGFR | RET | VEGFR2 (KDR)	MAPK signaling pathway; ErbB signaling pathway; VEGF signaling pathway	Antineoplastic; Receptor tyrosine kinase inhibitor
Varlitinib	Targeted	Protein kinases	Receptor tyrosine kinases	EGFR family	EGFR; ERBB2 (HER2, CD340); ERBB4 (HER4)	ErbB signaling pathway	Antineoplastic; Receptor tyrosine kinase inhibitor
Vemurafenib	Targeted	Protein kinases	Serine/threonine kinases	TKL group	BRAF	MAPK signaling pathway; ErbB signaling pathway	Antineoplastic; BRAF kinase inhibitor
Venetoclax	Targeted	Not elsewhere classified	Cellular process	Apoptosis	BCL2	Apoptosis	Antineoplastic; Bcl-2 inhibitor
Vinblastine	Cytotoxic	Not elsewhere classified	Cellular process	Cytoskeleton	TUBB	Gap junction	Antineoplastic; Tubulin polymerization inhibitor
Vincristine	Cytotoxic	Not elsewhere classified	Cellular process	Cytoskeleton	TUBB	Gap junction	Antineoplastic; Tubulin polymerization inhibitor
Vindesine	Cytotoxic	Not elsewhere classified	Cellular process	Cytoskeleton	TUBB	Gap junction	Antineoplastic; Tubulin polymerization inhibitor
Vismodegib	Targeted	G Protein-coupled receptors	Frizzled/Smoothened family	Smoothened	SMO	Hedgehog signaling pathway	Antineoplastic; Smoothened receptor antagonist
Vistusertib	Targeted	Protein kinases	Serine/threonine kinases	Other	MTOR	mTOR signaling pathway	Antineoplastic; mTOR inhibitor
Volasertib	Targeted	Protein kinases	Serine/threonine kinases	Other	PLK1	Cell cycle	Antineoplastic; Polo-like kinase inhibitor
Vorinostat	Targeted	Enzymes	Hydrolases (EC3)	Histone deacetylase	HDAC1; HDAC2; HDAC3; HDAC4; HDAC5; HDAC6; HDAC7; HDAC8; HDAC9; HDAC10; HDAC11	Cell cycle; Notch signaling pathway	Antineoplastic; Histone deacetylase inhibitor
XAV-939	Targeted	Enzymes	Transferases (EC2)	Pentosyltransferases	TNKS1; TNKS2	DNA replication	Antineoplastic
Xevinapant	Targeted	Not elsewhere classified	Cellular process	Apoptosis	cIAP1; cIAP2; XIAP	Apoptosis	Antineoplastic
YO-01027	Targeted	Enzymes	Hydrolases (EC3)	Aspartic peptidases	PSEN1; PSENEN; NCSTN; APH1A	Notch signaling pathway
MIK665	Targeted	Not elsewhere classified	Cellular process	Apoptosis	MCL1	Apoptosis; JAK-STAT signaling pathway; MicroRNAs in cancer; PI3K-Akt signaling pathway	Antineoplastic
Tegavivint	Targeted	Not elsewhere classified	Signaling molecules	Wnt signaling	CTNNB1	Wnt signaling pathway	Antineoplastic, beta-Catenin inhibitor
Pyrvinium	Targeted	Protein kinases	Serine/threonine kinases	CK1 group	CK1	Wnt signaling pathway
IWP-2	Targeted	Not elsewhere classified	Signaling molecules	Wnt signaling	PORCN	Wnt signaling pathway
