# Supplementary material for: Ewing and Ewing-like-sarcoma tumoroid biobank reveals distinct drug sensitivities: translocation makes the difference
Source: Research Square preprint supplement (doi:10.21203/rs.3.rs-5039845/v1), 2024-10-03
Supplement: Supplementary file 2 [file 4385de2f9a22e4f977e978be.xlsx]

## Sheet: Supplemental Table 2
	Reagent name	Company	Cat No.	Final concentration			Sample #	Medium condition
Basic medium	Advanced DMEM/F12	Gibco	#12634	1×			ES-001	STS1
	Penicillin/streptomycin	Invitrogen	#15140-122	0.01			ES-002	STS1
	Hepes	Invitrogen	#15630-056	0.01			ES-010	STS1
	GlutaMax 100×	Invitrogen	#35050-038	1×			ES-016	STS2
	B27 supplement without Vitamin A	Gibco	#12587-010	1×			ES-016	STS2
	N2 supplement	Gibco	#17502-048	1x			ES-027	STS1
	N-Acetylcysteine	Sigma Aldrich	#A9165	1.25 mM			ES-032	STS3
	BME	Bio-Techne	#3533-010-02	0.2%			ES-041	STS1
with either							ES-042	STS2
							ES-045	STS3
STS1	hEGF, human epidermal growth factor	Peprotech	AF-100-15-100	50 ng/mL			ES-046	STS1
	hFGF2, human fibroblast growth factor	Peprotech	100-19-50	50 ng/mL			ES-050	STS1
	hIGF1, human insulin-like growth factor-I	Peprotech	100-26-50	100 ng/mL			ES-053	STS2
or							ES-055	STS2
STS2	hEGF, human epidermal growth factor	Peprotech	AF-100-15-100	50 ng/mL			ES-057	STS2
	hFGF2, human fibroblast growth factor	Peprotech	100-19-50	10 ng/mL			ES-058	STS2
	hIGF1, human insulin-like growth factor-I	Peprotech	100-26-50	100 ng/mL			ES-059	STS2
or							ES-071	STS2
STS3	hEGF, human epidermal growth factor	Peprotech	AF-100-15-100	15 ng/mL			ES-075	STS3
	hFGF2, human fibroblast growth factor	Peprotech	100-19-50	15 ng/mL			ES-077	STS2
	hIGF1, human insulin-like growth factor-I	Peprotech	100-26-50	100 ng/mL			ES-080	STS2
							ES-085	STS2
							ES-086	STS3
							ES-087	STS3
							ES-088	STS3
							ES-090	STS3
							ES-093	STS2
							ES-094	STS2
							ES-095	STS2
							ES-096	STS2
							ES-097	STS3
							ES-101	STS3
							ES-102	STS3
