# Supplementary material for: Ewing and Ewing-like-sarcoma tumoroid biobank reveals distinct drug sensitivities: translocation makes the difference
Source: Research Square preprint supplement (doi:10.21203/rs.3.rs-5039845/v1), 2024-10-03
Supplement: Supplementary file 3 [file 602d1a3e450da564c3c49a0e.xlsx]

## Sheet: Supplemental Table 3
Fusion transcripts										Primers for RT-PCR
Sample ID	M-labels	Left gene	Left Chr Pos	Exon	Right Gene	Exon	Right Chr Pos			Sample ID	M-labels	Left gene	Primer -> Forward 5' - 3'	Right Gene	Primer -> Reverse 5' - 3'
ES-001	M002ZZH	EWSR1	chr 22: 29287134	Exon 8	FLI1	Exon 5	chr 11: 128805366			ES-001	M002ZZH	EWSR1	aacacctatgggcaaccgag	FLI1	TGAGGATTGGTCGGTGTGG
ES-002	M002ZZI	EWSR1	chr 22: 29287134	Exon 8	FLI1	Exon 6	chr 11: 128805366			ES-002	M002ZZI	EWSR1	aacacctatgggcaaccgag	FLI1	GTTGAGGCCAGAATTCATGTT
ES-010	M660AAA	EWSR1	chr22:29291599	Exon 9	FLI1	Exon 4	chr 11: 128772782			ES-010	M660AAA	EWSR1	AGGAGAGAACCGGAGCATGA	FLI1	CCCTGAGGTAACTGAGGTGTG
ES-016	M040AAB	EWSR1	chr 22: 29287134	Exon 8	FLI1	Exon 6	chr 11: 128805366			ES-016	M040AAB	EWSR1	aacacctatgggcaaccgag	FLI1	GTTGAGGCCAGAATTCATGTT
ES-016	M040AAB	EWSR1	chr 22: 29287134	Exon 8	FLI1	Exon 6	chr 11: 128805366			ES-016	M040AAB	EWSR1	aacacctatgggcaaccgag	FLI1	GTTGAGGCCAGAATTCATGTT
ES-027	M369AAA	EWSR1	chr 22: 29287134	Exon 8	FLI1	Exon 5	chr11: 128781958			ES-027	M369AAA	EWSR1	aacacctatgggcaaccgag	FLI1	TGAGGATTGGTCGGTGTGG
ES-032	M616AAA	CIC	chr 19: 42295060	Exon 20	DUX4	Exon 1	chr 4: 190174669			ES-032	M616AAA	CIC	aagatcatgcaggctgccactc	DUX4	GCGGAGTGGAGTCTCTCACCG
ES-041	M239AAB	EWSR1	chr 22: 29287134	Exon 8	FLI1	Exon 5	chr11: 128781958			ES-041	M239AAB	EWSR1	aacacctatgggcaaccgag	FLI1	TGAGGATTGGTCGGTGTGG
ES-042	M333AAA	EWSR1	chr 22: 29287134	Exon 8	FLI1	Exon 6	chr 11: 128805366			ES-042	M333AAA	EWSR1	aacacctatgggcaaccgag	FLI1	GTTGAGGCCAGAATTCATGTT
ES-045	M616AAA	CIC	chr 19: 42295060	Exon 20	DUX4	Exon 1	chr 4: 190174669			ES-045	M616AAA	CIC	aagatcatgcaggctgccactc	DUX4	GCGGAGTGGAGTCTCTCACCG
ES-046	M660AAA	EWSR1	chr22:29291599	Exon 9	FLI1	Exon 4	chr 11: 128772782			ES-046	M660AAA	EWSR1	AGGAGAGAACCGGAGCATGA	FLI1	CCCTGAGGTAACTGAGGTGTG
ES-048	M660AAA	EWSR1	chr 22: 29287134	Exon 8	FLI1	Exon 6	chr 11: 128805366			ES-048	M660AAA	EWSR1	aacacctatgggcaaccgag	FLI1	GTTGAGGCCAGAATTCATGTT
ES-050	M081AAD	EWSR1	chr22:29291599	Exon 9	FLI1	Exon 4	chr 11: 128772782			ES-050	M081AAD	EWSR1	AGGAGAGAACCGGAGCATGA	FLI1	CCCTGAGGTAACTGAGGTGTG
ES-053	M040AAB	BCOR	chr X: 40052113	Exon 15	CCNB3	Exon 5	chr X: 50308505			ES-053	M040AAB	BCOR	aggagctgttagatctggtgga	CCNB3	GTGGTTTCTCCATAATGTTTGGT
ES-055	M818AAC	EWSR1	chr 22: 29287134	Exon 8	FLI1	Exon 6	chr 11: 128805366			ES-055	M818AAC	EWSR1	aacacctatgggcaaccgag	FLI1	GTTGAGGCCAGAATTCATGTT
ES-057	M081AAD	BCOR	chr X: 40064599	Exon 7	KMT2D	Exon 43	chr 12: 49030280			ES-057	M081AAD	BCOR	TCTCCACAGGAAGATCTTTGTC	KMT2D	catcggtgcagcagaagatggt
ES-058	M369AAA	BCOR	chr X: 40052113	Exon 15	CCNB3	Exon 5	chr X: 50308505			ES-058	M369AAA	BCOR	aggagctgttagatctggtgga	CCNB3	GTGGTTTCTCCATAATGTTTGGT
ES-071	M333AAA	EWSR1	chr 22: 29287134	Exon 8	FLI1	Exon 6	chr 11: 128805366			ES-071	M333AAA	EWSR1	aacacctatgggcaaccgag	FLI1	GTTGAGGCCAGAATTCATGTT
ES-075	M616AAA	CIC	chr 19: 42295060	Exon 20	DUX4	Exon 1	chr 4: 190174669			ES-075	M616AAA	CIC	aagatcatgcaggctgccactc	DUX4	GCGGAGTGGAGTCTCTCACCG
ES-077	M818AAC	BCOR	chr X: 40064599	Exon 7	KMT2D	Exon 43	chr 12: 49030280			ES-077	M818AAC	BCOR	TCTCCACAGGAAGATCTTTGTC	KMT2D	catcggtgcagcagaagatggt
ES-080	M040AAB	EWSR1	chr 22: 29287134	Exon 8	FLI1	Exon 6	chr 11: 128805366			ES-080	M040AAB	EWSR1	aacacctatgggcaaccgag	FLI1	GTTGAGGCCAGAATTCATGTT
ES-085	M003ZZG	EWSR1	chr 22: 29287134	Exon 8	ERG	Exon 11	chr 21: 38383923			ES-085	M003ZZG	EWSR1	aacacctatgggcaaccgag	ERG	cgtcatcttgaactccccgt
ES-086	M003ZZD	CIC	chr 19: 42295060	Exon 21	DUX4	Exon 1	chr 4: 190174669			ES-086	M003ZZD	CIC	aagatcatgcaggctgccactc	DUX4	TCTAGGAGAGGTTGCGCCTG
ES-087	M003ZZD	CIC	chr 19: 42295060	Exon 21	DUX4	Exon 1	chr 4: 190174669			ES-087	M003ZZD	CIC	aagatcatgcaggctgccactc	DUX4	TCTAGGAGAGGTTGCGCCTG
ES-088	M003ZZD	CIC	chr 19: 42295060	Exon 21	DUX4	Exon 1	chr 4: 190174669			ES-088	M003ZZD	CIC	aagatcatgcaggctgccactc	DUX4	TCTAGGAGAGGTTGCGCCTG
ES-090	M616AAA	CIC	chr 19: 42295060	Exon 21	DUX4	Exon 1	chr 4: 190174669			ES-090	M616AAA	CIC	aagatcatgcaggctgccactc	DUX4	TCTAGGAGAGGTTGCGCCTG
ES-093	M003ZZG	EWSR1	chr 22: 29287134	Exon 8	ERG	Exon 11	chr 21: 38383923			ES-093	M003ZZG	EWSR1	aacacctatgggcaaccgag	ERG	cgtcatcttgaactccccgt
ES-094	M003ZZE	EWSR1	chr 22: 29287134	Exon 8	ERG	Exon 8	chr 21: 38392444			ES-094	M003ZZE	EWSR1	aacacctatgggcaaccgag	ERG	cgtcatcttgaactccccgt
ES-095	M776AAE	EWSR1	chr 22: 29287134	Exon 8	FLI1	Exon 5	chr 11: 128781958			ES-095	M776AAE	EWSR1	aacacctatgggcaaccgag	FLI1	TGAGGATTGGTCGGTGTGG
ES-096	M003ZZF	EWSR1	chr 22: 29292169	Exon 10	FEV	Exon 2	chr 2: 218984305			ES-096	M003ZZF	EWSR1	ctcatcggggtccgtcattt	FEV	gatctgtccgctgcctttct
ES-097	M003ZZH	CIC	chr 19: 42294903	Exon 21	DUX4	Exon 2	chr 4: 190175193			ES-097	M003ZZH	CIC	tgcagctctttcaggaccatggc	DUX4	ggatccacagggagggggcatt
ES-101	M003ZZH	CIC	chr 19: 42294903	Exon 21	DUX4	Exon 2	chr 4: 190175193			ES-101	M003ZZH	CIC	tgcagctctttcaggaccatggc	DUX4	ggatccacagggagggggcatt
ES-102	M426AAE	EWSR1	chr 22: 29287134	Exon 8	ERG	Exon 8	chr 21: 38392444			ES-102	M426AAE	EWSR1	aacacctatgggcaaccgag	ERG	cgtcatcttgaactccccgt
