# Supplementary material for: Ewing and Ewing-like-sarcoma tumoroid biobank reveals distinct drug sensitivities: translocation makes the difference
Source: Research Square preprint supplement (doi:10.21203/rs.3.rs-5039845/v1), 2024-10-03
Supplement: Supplementary file 4 [file f312845a0f0f4a96c742d606.xlsx]

## Sheet: Supplemental Table 1
Sample #	M-labels	Diagnose	Time point	Neoadjuvant treatment	Tumor location	Sex	Age	Hospital/ Insitute
ES-001	M002ZZH	EWSR1::FLI1	Primary	Naïve	NA	Female	NA	PMC-PO
ES-002	M002ZZI	EWSR1::FLI1	Primary	Naïve	NA	Female	NA	PMC-PO
ES-010	M660AAA	EWSR1::FLI1	Primary	Naïve	Femur	Male	12	PMC-PO
ES-016	M040AAB	EWSR1::FLI1	Primary	Naïve	Femur	Male	14	PMC-PO
ES-016	M040AAB	EWSR1::FLI1	Metastatic leasion	Naïve	Lymph node - para-iliac	Male	14	PMC-PO
ES-027	M369AAA	EWSR1::FLI1	Primary	Naïve	Fibula	Male	10	PMC-PO
ES-032	M616AAA	CIC::DUX4	Resection	VIDE (2x)	Schouder	Female	16	PMC-PO
ES-041	M239AAB	EWSR1::FLI1	Relapse	VIDE	Pelvis	Male	13	PMC-PO
ES-042	M333AAA	EWSR1::FLI1	Relapse - meta	VIDE, postop VAI, HD-TreoMel+ASCT	Lung	Male	13	PMC-PO
ES-045	M616AAA	CIC::DUX4	Relapse - meta	VIIDE, postop TEMIRI	Lung	Female	16	PMC-PO
ES-046	M660AAA	EWSR1::FLI1	Relapse	VDC/IE, 2nd line TEMIRI	Femur	Male	12	PMC-PO
ES-050	M660AAA	EWSR1::FLI1	Metastatic leasion	TEMIRI	Lung	Male	12	PMC-PO
ES-053	M081AAD	BCOR::CCNB3	Relapse	EpSSG-RMS HR, VIDE	Foot	Male	12	PMC-PO
ES-055	M040AAB	EWSR1::FLI1	Relapse	VIDE, VAC, HD-TreoMel	Femur	Male	14	PMC-PO
ES-057	M818AAC	BCOR::KMT2D	Relapse	VIDE, VAC	Iliac bone	Male	10	PMC-PO
ES-058	M081AAD	BCOR::CCNB3	Relapse - meta	Gem/Doc (rEECur-trial)	Lung	Male	12	PMC-PO
ES-059	M369AAA	EWSR1::FLI1	Relapse - meta	VIDE, VAC, ASCT	Frontal bone and vertebra L4	Male	10	PMC-PO
ES-071	M333AAA	EWSR1::FLI1	Relapse	TEMIRI, Cyclo/Topo, maintenance FaR-RMS	Lung	Male	13	PMC-PO
ES-075	M616AAA	CIC::DUX4	2nd biopsy	Naïve	Schouder	Female	16	PMC-PO
ES-077	M818AAC	BCOR::KMT2D	Relapse	Cyclo/Topo, Ifosfamide	Hip	Male	10	PMC-PO
ES-080	M040AAB	EWSR1::FLI1	Metastatic leasion	Cyclo/Topo, Ifosfamide	Lung	Male	14	PMC-PO
ES-085	M003ZZG	EWSR1::ERG	Primary	Naïve	Pelvis	Male	5	EPO
ES-086	M003ZZD	CIC::DUX4	Primary	Post-chemo	Gluteus	Female	15	XenTech
ES-087	M003ZZD	CIC::DUX4	Primary	Post-chemo	Gluteus	Female	15	XenTech
ES-088	M003ZZD	CIC::DUX4	Primary	Post-chemo	Gluteus	Female	15	XenTech
ES-090	M616AAA	CIC::DUX4	Primary	Naïve	Schoulder	Female	16	PMC-PO
ES-093	M003ZZG	EWSR1::ERG	Progression under treatment	TEMECI	Pelvis	Male	6	EPO
ES-094	M003ZZE	EWSR1::ERG; FEV::FUS	Metastatic leasion	NA	Lung	Male	8	CRL
ES-095	M776AAE	EWSR1::FLI1	Primary	Naïve	Thumb	Female	0	PMC-PO
ES-096	M003ZZF	EWSR1::FEV	Metastatic leasion	NA	NA	NA	NA	CRL
ES-097	M003ZZH	CIC::DUX4	Primary	Naïve	Addomen	Male	35	NKI
ES-101	M003ZZH	CIC::DUX4	Resection, After treatment	VDC/IE	Abdomen	Male	35	NKI
ES-102	M426AAE	EWSR1::ERG	Relaps	VDC/IE	Rib	Male	10	PMC-PO
	PMC-PO; The Princess Maxima Center for Pediatric Oncology
	NKI; Sarcomas and GIST Center, Netherlands Cancer Institute – Antoni van Leeuwenhoek (NKI-AVL), Amsterdam, The Netherlands
	EPO; Experimental Pharmacology & Oncology Berlin-Buch GmbH
	XenTech; XenTech, 4 rue Pierre Fontaine, Evry, France
	CRL; Charles River Discovery Research Services Gemany GmbH, Charles River Laboratories Inc, Freiburg, Germany
	VIDE = Vincristine/ Ifosfamide/ Doxorubicin/ Etoposide
	VDC/IE = Vincrinstine/ Doxorubicin/ Cyclophosphamide and Ifosfamide/ Etoposide
	VAI = Vincristine/ Actinomycin D/ Ifosfamide
	TEMIRI= Temozolomide/ Irinotecan
	VAC = Vincristine/ Actinomycin D/ Cyclophosphamide
	HD-TreoMel = High-Dose Treosulfan and Melphalan
	Cyclo/Topo = Cyclophosphamide/ Topotecan
	TEMECI = Temozolomide/ Etoposide/ Carboplatin/Irinotecan
	ASCT = Autologous Stem Cell Transplant
	Gem/Doc = Gemcitabine/ Docetaxel
	Maintenance FaR-RMS = Cyclofosfamide + Vinorelbine
